1 **A T6SS in the coral pathogen *Vibrio coralliilyticus* secretes an arsenal**  
2 **of anti-eukaryotic effectors and contributes to virulence**

3

4 **Short title:**

5 ***Vibrio coralliilyticus* T6SS effector repertoires**

6

7 Shir Mass<sup>1</sup>, Hadar Cohen<sup>1</sup>, Motti Gerlic<sup>1</sup>, Blake Ushijima<sup>2</sup>, Julia C. van Kessel<sup>3</sup>, Eran Bosis<sup>4</sup>, and  
8 Dor Salomon<sup>1,\*</sup>

9

10 <sup>1</sup> Department of Clinical Microbiology and Immunology, School of Medicine, Faculty of Medical  
11 and Health Sciences, Tel Aviv University, Israel

12 <sup>2</sup> Department of Biology and Marine Biology, University of North Carolina Wilmington,  
13 Wilmington, NC, USA

14 <sup>3</sup> Department of Biology, Indiana University, Bloomington, Indiana, USA

15 <sup>4</sup> Department of Biotechnology Engineering, Braude College of Engineering, Karmiel, Israel

16 \* For correspondence: dorsalomon@mail.tau.ac.il

17

18 **Keywords:** T6SS, *Vibrio coralliilyticus*, *Artemia*, competition, virulence, effectors

19

20

21 **Abstract**

22 *Vibrio coralliilyticus* (*Vcor*) is a pathogen of coral and shellfish, leading to devastating economic  
23 and ecological consequences worldwide. Although rising ocean temperatures correlate with  
24 increased *Vcor* pathogenicity, the specific molecular mechanisms and determinants contributing  
25 to virulence remain poorly understood. Here, we systematically analyzed the type VI secretion  
26 system (T6SS), a contact-dependent toxin delivery apparatus, in *Vcor*. We identified two  
27 omnipresent T6SSs that are activated at temperatures in which *Vcor* becomes virulent; T6SS1  
28 is an antibacterial system mediating interbacterial competition, whereas T6SS2 mediates anti-  
29 eukaryotic toxicity and contributes to mortality during infection of an aquatic model organism,  
30 *Artemia salina*. Using comparative proteomics, we identified the T6SS1 and T6SS2 toxin  
31 arsenals of three *Vcor* strains with distinct disease etiologies. Remarkably, T6SS2 secretes at  
32 least nine novel anti-eukaryotic toxins comprising core and accessory repertoires. We propose  
33 that T6SSs differently contribute to *Vcor*'s virulence: T6SS2 plays a direct role by targeting the  
34 host, while T6SS1 plays an indirect role by eliminating competitors.

35

36 **Author Summary**

37 Coral reefs are diverse ecosystems providing habitats for various fish, invertebrates, and  
38 microorganisms. Climate change, leading to rising ocean water temperatures, correlates with  
39 coral bleaching and mass mortality events. An implicated causal agent of coral disease  
40 outbreaks is the marine bacterium *Vibrio coralliilyticus*. Here, we found that two toxin injection  
41 systems present in all *Vibrio coralliilyticus* strains are regulated by temperature; we revealed the  
42 toxins that they secrete and their function in competition against rival bacteria and in the  
43 intoxication of an animal host. Our findings implicate these systems as previously unappreciated  
44 contributors to *Vibrio coralliilyticus* virulence, illuminating possible targets to treat or prevent  
45 coral infection.

## 46 Introduction

47 The oceans are home to Gram-negative marine bacteria of the genus *Vibrio*. These include  
48 many established and emerging pathogens that infect humans and marine animals [1,2]. In the  
49 past, vibrios were primarily associated with the warmer equatorial waters. Yet, in recent  
50 decades, they have spread to other regions, including the northern USA, Canada, and North  
51 Europe [3,4]. This spread correlates with rising ocean surface-level temperatures and disease  
52 outbreaks [5,6].

53 Corals are marine animals affected by rising ocean temperatures caused by climate change and  
54 the spread of vibrios [7–9]. They are ecologically and economically important because they  
55 provide diverse ecosystems used as habitats for various fish and invertebrates, as well as  
56 helping to protect shorelines from storm surges and erosion [10]. The coral animal lives in a  
57 symbiotic relationship with photosynthetic endosymbiotic dinoflagellates and microbes  
58 (collectively called the coral holobiont) [11–14]. *Vibrio coralliilyticus* (*Vcor*) is a bacterial  
59 pathogen shown to be a cause of diseases resulting in bleaching or tissue loss in corals  
60 [9,15,16]. Among other coral pathogens [9], *Vcor* stands out due to its wide geographic spread  
61 and broad range of reported hosts. Aside from corals, *Vcor* is also responsible for mortalities in  
62 shellfish hatcheries [17].

63 The coral holobiont is affected by various environmental conditions, such as shifts in water  
64 temperature, pH, and nutrients. Elevated temperature is a key factor in many *Vcor* infections  
65 because it increases the abundance and virulence of many *Vcor* strains [14]. At temperatures  
66 below 23°C, *Vcor* strains are predominantly not pathogenic [8]. However, the virulence of many  
67 strains increases when temperatures rise above 23°C [14,15,18]. In some cases, the symbiotic  
68 dinoflagellates are killed, and coral bleaching occurs. With most pathogenic strains, shifts to  
69 >27°C result in coral tissue lysis and increased coral mortality [15]. Elevated temperatures are  
70 associated with the production of proteases and hemolysins, motility, antimicrobial resistance,  
71 and secretion systems in *Vcor* [19]. In addition, the expression of *toxR*, a transcription regulator  
72 associated with virulence in other vibrios [20], correlates with increased temperature and was  
73 shown to contribute to *Vcor* virulence [21]. These data provide strong evidence that temperature  
74 regulates virulence-associated genes in *Vcor*. Nevertheless, it remains unclear how these  
75 factors contribute to pathogenicity and whether the same factors play a role in virulence towards  
76 different hosts.

77 Many vibrios employ a specialized toxin delivery mechanism, the type VI secretion system  
78 (T6SS), to manipulate their environment [22–29]. The T6SS is a proteinaceous apparatus that is  
79 assembled inside the bacterial cell: a sheath structure engulfs an inner tube made of stacked  
80 hexameric rings of Hcp proteins, which is capped by a spike comprising a VgrG trimer  
81 sharpened by a PAAR repeat-containing protein (hereafter referred to as PAAR) [30]. This tube-  
82 spike complex is decorated with toxic proteins, called effectors, that mediate the toxic activities  
83 of the T6SS [31–33]. Contraction of the sheath propels the tube-spike complex out of the cell,  
84 providing it with sufficient force to penetrate the membrane of a neighboring cell where effectors  
85 are deployed [34]. Whereas most T6SSs investigated to date mediate interbacterial  
86 competitions by delivering antibacterial effectors, a few T6SSs have been shown to target  
87 eukaryotes and mediate virulence [33,35,36]. In accordance, although most *Vibrio* T6SSs play a  
88 role in interbacterial competitions [24–28,37–39], we and others recently revealed *Vibrio* T6SSs  
89 and effectors that target eukaryotes, and we postulated that they play a role in virulence [22,40–  
90 43].

91 Several studies reported the temperature-dependent expression of T6SS components in *Vcor*  
92 [19,42], suggesting that T6SSs play a role in the temperature-regulated transition to a  
93 pathogenic lifestyle. The antibacterial activity of one T6SS was previously demonstrated in two

94 *Vcor* strains [42,44]. However, the presence of other T6SSs in the *Vcor* pan-genome, their role,  
 95 regulation, effector repertoire, and contribution to virulence remain unknown. Here, we  
 96 systematically analyzed the T6SSs in the *Vcor* pan-genome and revealed two omnipresent  
 97 systems. Using three *Vcor* strains as model systems, we experimentally defined the  
 98 environmental conditions regulating the activation of these two T6SSs. We also identified their  
 99 function and effector repertoires. Importantly, we revealed nine novel anti-eukaryotic effectors  
 100 delivered by the *Vcor* T6SS2, contributing to *Vcor* virulence.

101

## 102 Results

### 103 Two T6SSs are omnipresent in *Vibrio coralliilyticus* strains

104 To identify the T6SSs found in the pan-genome of *Vibrio coralliilyticus* (*Vcor*), we retrieved the  
 105 sequences of the core T6SS sheath component, TssB, from 31 available RefSeq *Vcor* genomes  
 106 (**Dataset S1**) and analyzed their genomic neighborhoods. Our analyses revealed that all  
 107 genomes harbor two conserved T6SSs, named T6SS1 and T6SS2 (**Fig. 1** and **Dataset S2**),  
 108 suggesting that these T6SSs play an important role in the *Vcor* lifestyle. T6SS1 is similar to the  
 109 previously investigated T6SS1 from *V. parahaemolyticus* [24,45], *V. alginolyticus* [26], and *V.*  
 110 *proteolyticus* [28], sharing the same gene content and organization. We recently showed that  
 111 this system mediates interbacterial competition in the *Vcor* type strain BAA-450 and in strain  
 112 OCN008 [42,44]. Two additional T6SSs, which we named T6SS3 and T6SS4, are each found in  
 113 a single *Vcor* genome (**Dataset S2**). Notably, two genes encoding structural core components in  
 114 T6SS4 appear to include frameshifts, and the gene cluster lacks a gene encoding the  
 115 conserved T6SS core component, TssH (**Fig. 1**). Therefore, it is possible that T6SS4 is not  
 116 functional.

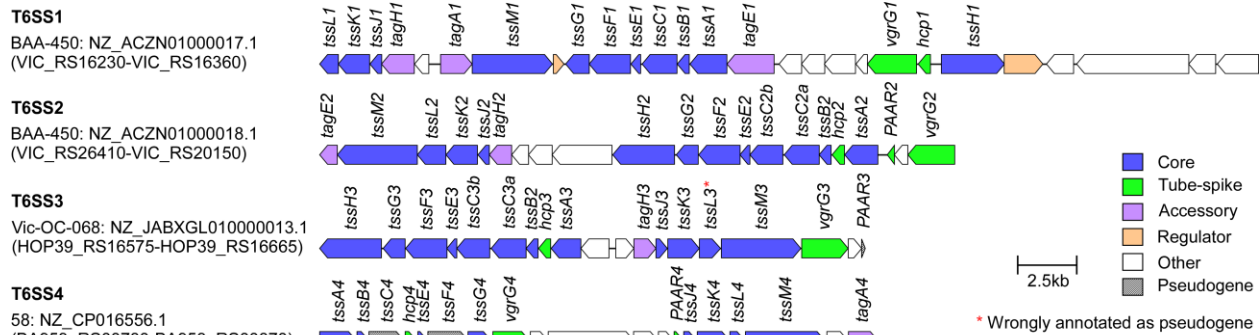

117 **Fig. 1. Representative T6SS gene clusters found in *Vibrio coralliilyticus* genomes.** The  
 118 strain name, GenBank accession number, and the first and last locus tag are denoted on the  
 119 left. Genes are denoted by arrows indicating the predicted direction of transcription. Encoded  
 120 proteins or domains are denoted above the genes.

121

### 122 Environmental conditions regulate *Vibrio coralliilyticus* T6SSs

123 Because T6SS1 and T6SS2 are omnipresent in *Vcor*, we set out to investigate their activation  
 124 and function. First, we sought to determine whether T6SS1 and T6SS2 are regulated by  
 125 environmental conditions regulating *Vcor* virulence. To this end, we selected three  
 126 representative *Vcor* strains harboring both T6SSs: BAA-450 (the type strain), OCN008, and  
 127 OCN014. These strains were isolated from different coral hosts and display different disease  
 128 etiologies [16,46,47]. Strains BAA-450 and OCN014 have a temperature-dependent infection

129 mode, and they become more virulent as temperatures rise above 23°C; the virulence of strain  
130 OCN008 does not significantly change from 23 - 27°C [16,18,21].

131 To determine whether the activation of T6SS1 and T6SS2 depends on temperature or nutrient  
132 availability, we monitored the expression and secretion of the conserved secreted T6SS  
133 structural components, VgrG1 and Hcp2 [23], respectively. Bacteria were grown in either rich  
134 (marine LB; MLB) or poor (glycerol artificial sea water; GASW) media and under a range of  
135 physiologically relevant temperatures that affect *Vcor* pathogenicity: 19, 23, 28, and 31°C  
136 [16,21,46]. As shown in Fig. 2A-B, we found that the activity of both T6SS1 and T6SS2 is  
137 temperature- and media-dependent. In rich media, both systems are active between 23-31°C;  
138 T6SS1 secretion peaks at 28°C, whereas T6SS2 secretion peaks at 31°C (Fig. 2A). Notably,  
139 secretion via T6SS1 in strain OCN008 appears lower than in BAA-450 and OCN014. In poor  
140 media, T6SS1 secretion peaks at 23°C in all strains and is retained at higher temperatures only  
141 in strain BAA-450 (Fig. 2B); T6SS2 secretion is only observed in strain BAA-450 at 23°C.  
142 Comparison between the activity of both systems in rich and poor media at 28°C revealed  
143 higher levels of secretion in rich media (Fig. 2C). Therefore, unless otherwise indicated, we  
144 performed subsequent analyses of T6SS1 and T6SS2 when *Vcor* strains are grown in rich  
145 media at 28°C, conditions in which both systems are active in all three strains.

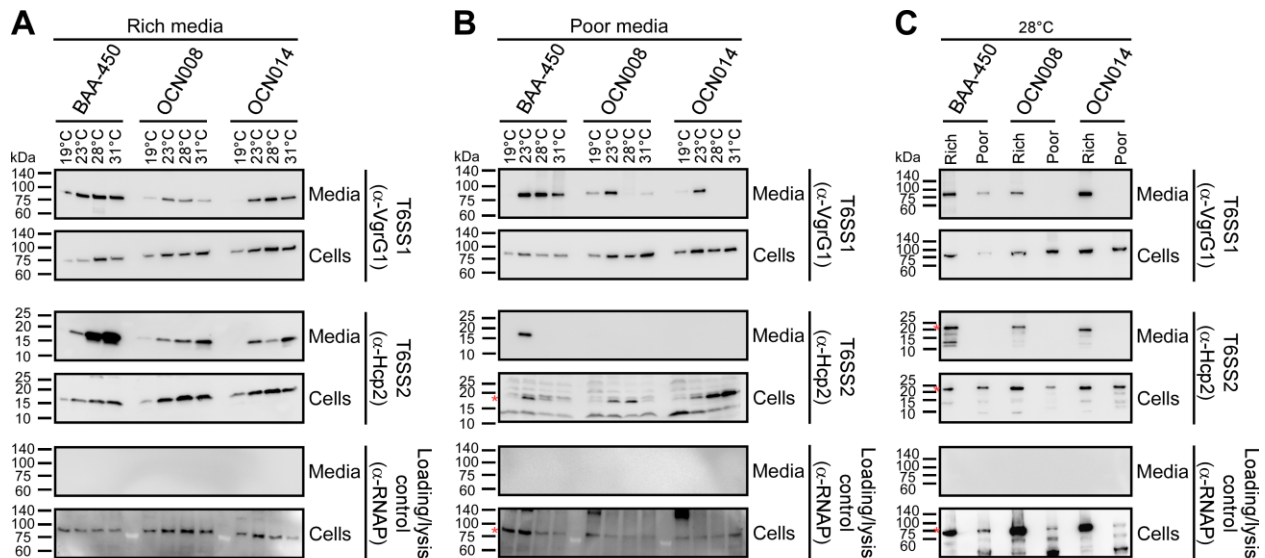

146 **Fig. 2. *Vibrio coralliilyticus* T6SS1 and T6SS2 are regulated by environmental conditions.**  
147 Expression (cells) and secretion (media) of VgrG1 and Hcp2 from the three indicated *Vcor*  
148 strains grown for 4 hours at the indicated temperatures in “rich” marine LB medium (A) or “poor”  
149 glycerol artificial sea water medium (B). C) Comparison of VgrG1 and Hcp2 expression and  
150 secretion when *Vcor* strains were grown at 28°C in “rich” or “poor” media. RNA polymerase  
151 sigma 70 (RNAP) was used as a loading and lysis control. Asterisks denote expected protein  
152 sizes. Results from a representative experiment out of at least three independent experiments  
153 are shown.

154

### 155 *T6SS1* mediates interbacterial competitions

156 We previously reported that T6SS1 in strains BAA-450 and OCN008 mediates antibacterial  
157 activity during interbacterial competitions [42,44]. To determine whether this is also true for  
158 T6SS1 in strain OCN014 and whether T6SS2 also plays a role in interbacterial competition, we

159 set out to monitor the outcome of interbacterial competitions using *Vcor* strains in which the two  
 160 T6SSs were inactivated, either individually or together. To this end, we first constructed *Vcor*  
 161 mutant strains in which we inactivated T6SS1 by deleting the gene encoding the conserved  
 162 structural component Hcp1 ( $\Delta hcp1$ ), and T6SS2 by deleting the gene encoding the conserved  
 163 structural component TssM2 ( $\Delta tssM2$ ) (Fig. S1A). These mutations did not affect bacterial  
 164 growth (Fig. S1B). When competed against a sensitive a *V. natriegens* prey strain on rich media  
 165 plates at 28°C, all three *Vcor* strains killed the prey, evident by the decrease in prey viability  
 166 during the four hours of co-incubation with the wild-type *Vcor* attackers (Fig. 3A-C). This killing  
 167 was dependent on T6SS1, since its inactivation in the attacker strains by deleting *hcp1*  
 168 abolished the toxicity. Inactivation of T6SS2 by deleting *tssM2*, either alone or in combination  
 169 with an inactive T6SS1, had no effect on the observed antibacterial activity of *Vcor*. Taken  
 170 together, our results confirm that the *Vcor* T6SS1 mediates antibacterial activity and suggest  
 171 that T6SS2 does not play a role in interbacterial competition.

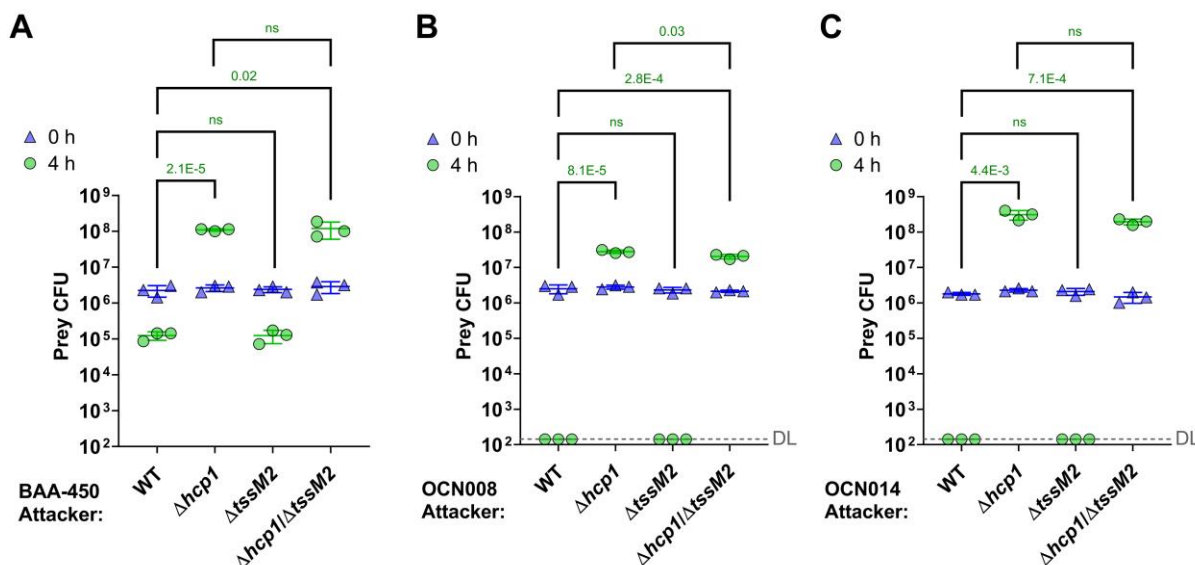

172 **Fig. 3. *Vibrio coralliilyticus* T6SS1 mediates interbacterial competition. A-C)** Viability  
 173 counts (colony forming units; CFU) of *V. natriegens* prey strains before (0 h) and after (4 h) co-  
 174 incubation with the indicated *Vcor* BAA-450 (A), OCN008 (B), or OCN014 (C) attacker strains  
 175 on MLB plates at 28°C. The statistical significance between samples at the 4 h time point was  
 176 calculated using an unpaired, two-tailed Student's *t* test; ns, no significant difference ( $P > 0.05$ );  
 177 WT, wild-type; DL, the assay's detection limit. Data are shown as the mean  $\pm$  SD;  $n = 3$ . The  
 178 data shown are a representative experiment out of at least three independent experiments.

179

### 180 T6SS2 targets eukaryotes

181 Based on the above results, we hypothesized that T6SS2 mediates anti-eukaryotic activities. To  
 182 investigate whether T6SS2 plays a role in bacterial virulence, we employed the saline lake-  
 183 dwelling brine shrimp, *Artemia salina*, as an aquatic animal model [41,48,49]. Wild-type *Vcor*  
 184 OCN008 was lethal to *Artemia* nauplii (larvae), with a median survival of 53 hours. Inactivation  
 185 of T6SS2, either alone ( $\Delta tssM2$ ) or together with T6SS1 ( $\Delta hcp1/\Delta tssM2$ ), resulted in a  
 186 significantly reduced lethality (median survival undefined or 56 hours, respectively), whereas  
 187 inactivation of T6SS1 ( $\Delta hcp1$ ) had no effect (Fig. 4A). These results reveal a role for the *Vcor*  
 188 T6SS2 in pathogenicity during infection of a eukaryotic host.

189 To further investigate the anti-eukaryotic activity of *Vcor* T6SS2 in all three strains, we used real-  
190 time microscopy to monitor *Vcor*-mediated cell death kinetics. To this end, we employed bone  
191 marrow-derived macrophages (BMDMs), which have been previously used as a model to  
192 monitor the toxic effects of another *Vibrio* T6SS [40]. Various levels of cell death were observed  
193 starting ~30 minutes after adding either of the wild-type *Vcor* strains BAA-450, OCN008, or  
194 OCN014 (Fig. 4B-D). Remarkably, inactivation of T6SS2, either alone ( $\Delta tssM2$ ) or together with  
195 T6SS1 ( $\Delta hcp1/\Delta tssM2$ ), completely abrogated the *Vcor*-mediated cell death, whereas  
196 inactivation of T6SS1 ( $\Delta hcp1$ ) had no or mild effect. These results support our hypothesis that  
197 *Vcor* T6SS2 targets eukaryotes.

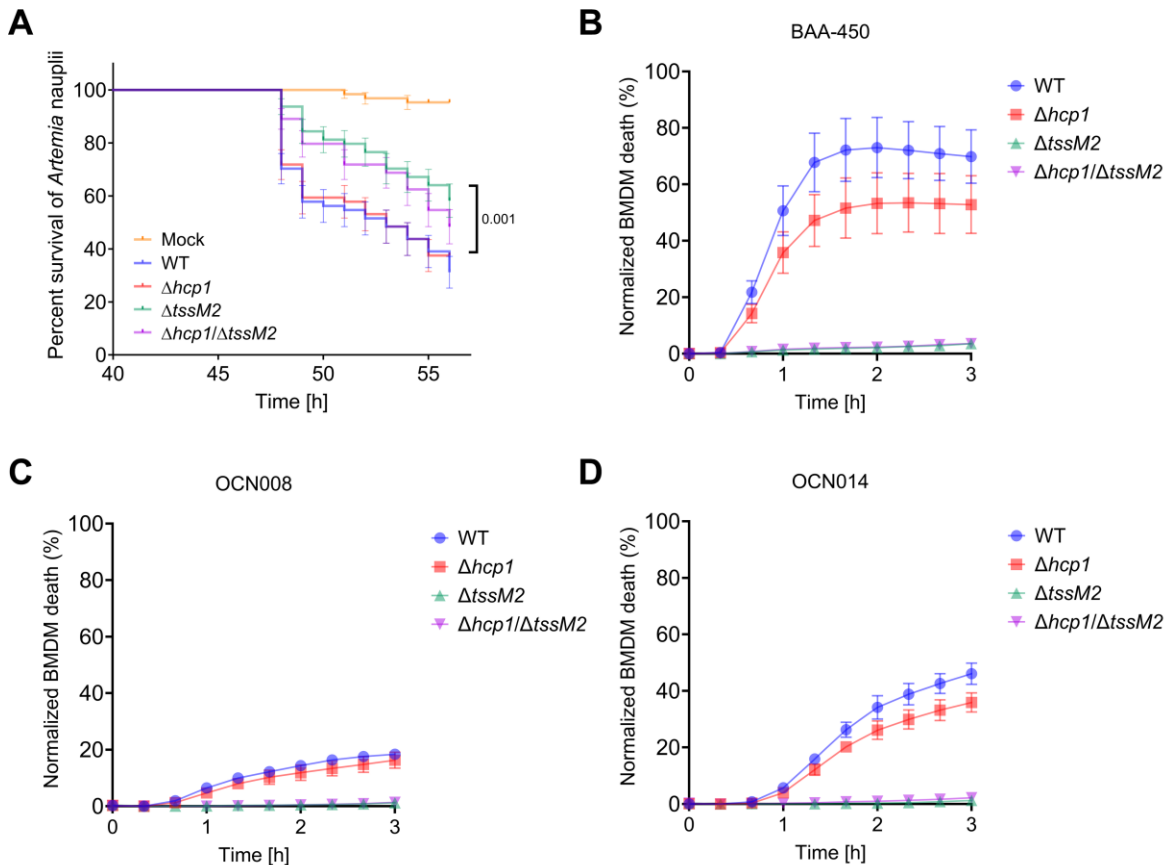

198 **Fig. 4. *Vibrio coralliilyticus* T6SS2 mediates lethality in *Artemia* nauplii and in**  
199 **macrophages. A)** *Artemia* nauplii were challenged with the indicated *Vcor* OCN008 strains, and  
200 survival was assessed 40 to 56 hours post-infection. Approximately  $5 \times 10^7$  bacteria were added  
201 to each well containing 2 nauplii. Data are shown as the mean  $\pm$  SE of four biological replicates,  
202 each comprising 16 nauplii for every bacterial strain. The statistical significance between the WT  
203 and  $\Delta tssM2$  curves was calculated using the Log-rank (Mantel-Cox) test. **B-D)** Assessment of  
204 cell death upon infection of bone marrow-derived macrophages (BMDMs) with the indicated  
205 *Vcor* BAA-450 (B), OCN008 (C), or OCN014 (D) strains. Approximately  $3.5 \times 10^4$  BMDMs were  
206 seeded into 96-well plates in triplicates and infected with *Vcor* strains at a multiplicity of infection  
207 (MOI)  $\sim 4$ . Propidium iodide (PI) was added to the medium prior to infection, and its uptake  
208 kinetics were assessed using real-time microscopy. WT, wild-type. Results from a representative  
209 experiment out of at least three independent experiments are shown in B-D.

210

## 211 *T6SS1 and T6SS2 secrete diverse effector arsenals*

212 Next, we performed comparative proteomics analyses to reveal the *Vcor* T6SS secretomes and  
213 identify the effectors that mediate the antibacterial and anti-eukaryotic activities described  
214 above. Using mass spectrometry, we compared the proteins secreted by the wild-type *Vcor*  
215 strains BAA-450, OCN008, and OCN014 with those secreted by their isogenic mutants in which  
216 either T6SS1 or T6SS2 have been inactivated ( $\Delta hcp1$  or  $\Delta tssM2$ , respectively).

217 **T6SS1 secretomes:** We identified eleven, six, and eleven proteins that were significantly  
218 enriched in the secretomes of wild-type strains BAA-450, OCN008, and OCN014, respectively,  
219 compared to their T6SS1<sup>-</sup> ( $\Delta hcp1$ ) mutants (**Fig. 5**, **Table 1**, and **Dataset S3-S5**). These include  
220 the secreted tube-spike structural components Hcp1 (which was deleted to inactivate T6SS1),  
221 VgrG1, and PAAR-like proteins. Most of the additional proteins are predicted antibacterial or  
222 anti-eukaryotic effectors, or proteins encoded next to them, including: (i) homologs of previously  
223 described T6SS effectors, with predicted toxic domains that target the peptidoglycan (e.g.,  
224 WP\_006961156.1 and WP\_006961879.1); (ii) proteins containing MIX domains, which are  
225 markers for T6SS effectors [45], with predicted nuclease or pore-forming toxic domains (e.g.,  
226 WP\_039951132.1 and WP\_201765497.1); and (iii) proteins that have yet to be described as  
227 related to T6SSs, which were identified only in the T6SS1 secretome of strain OCN008 (e.g.,  
228 WP\_021456284.1 and WP\_021455387.1, which is a DEAD/DEAH box helicase). In accordance  
229 with our observation that the T6SS1 appears less active in strain OCN008 compared to the two  
230 other *Vcor* strains under the assay conditions (**Fig. 2A**), the comparative proteomics intensity  
231 difference for the putative OCN008 T6SS1 effectors was low (**Fig. 5B**), suggesting that the latter  
232 type of proteins detected only in the OCN008 T6SS1 secretome may be false positives. As  
233 previously reported for similar T6SSs in other vibrios [26,28,45,50], some of the identified  
234 proteins are encoded within the T6SS1 gene cluster, whereas others are encoded in auxiliary or  
235 orphan operons. Moreover, predicted antibacterial effectors are encoded next to putative  
236 immunity genes. Taken together, these results support our findings that *Vcor* T6SS1 plays a role  
237 in interbacterial competitions using antibacterial effectors. Interestingly, in each *Vcor* strain, we  
238 also identified a secreted MIX domain-containing effector that we previously showed or  
239 hypothesized targets eukaryotes rather than bacteria (e.g., WP\_006962196.1) [22]. This finding  
240 suggests that T6SS1 also plays a role in interactions with eukaryotes, even though our  
241 experiments did not reveal significant T6SS1-mediated anti-eukaryotic effects.

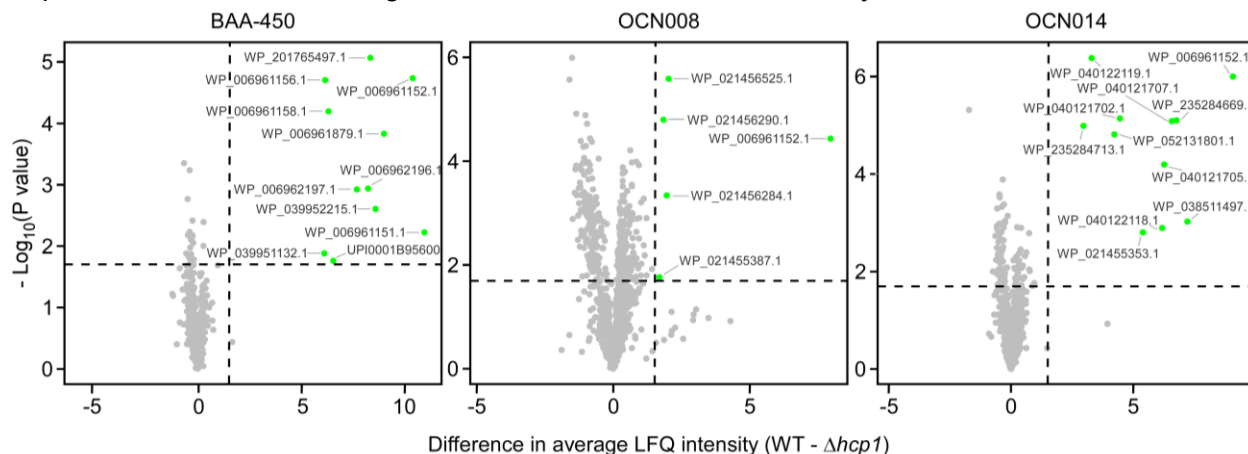

242 **Fig. 5. *Vibrio corallilyticus* T6SS1 effector repertoires.** Volcano plots summarizing the  
243 comparative proteomics of proteins identified in the media of the three indicated *Vcor* strains  
244 with an active T6SS1 (WT, wild-type) or an inactive T6SS1 ( $\Delta hcp1$ ), using label-free  
245 quantification (LFQ). The average LFQ signal intensity difference between the WT and  $\Delta hcp1$   
246 strains is plotted against the  $-\text{Log}_{10}$  of Student's *t* test *P* values ( $n = 3$  biological replicates).



247 Proteins that were significantly more abundant in the secretome of the WT strains (difference in  
 248 average LFQ intensities > 1.6; *P* value < 0.02; with a minimum of two Razor unique peptides  
 249 and Score > 15) are denoted in green.

250

251 **Table 1. *Vibrio coralliilyticus* T6SS1 secretomes identified by comparative proteomics**

| Predicted role           | Predicted activity or domain                                       | BAA-450                                             |             | OCN008            |               | OCN014            |              |
|--------------------------|--------------------------------------------------------------------|-----------------------------------------------------|-------------|-------------------|---------------|-------------------|--------------|
|                          |                                                                    | Protein accession                                   | Gene locus  | Protein accession | Gene locus    | Protein accession | Gene locus   |
| T6SS structural          | Hcp                                                                | WP_006961152.1                                      | VIC_RS16330 | WP_006961152.1    | G3U99_RS23805 | WP_006961152.1    | JV59_RS20030 |
|                          | VgrG                                                               | WP_006961151.1                                      | VIC_RS16325 | N/D               | N/D           | WP_040121702.1    | JV59_RS20025 |
|                          | PAAR-like (DUF4150)                                                | WP_039952215.1                                      | VIC_RS19185 | N/D               | N/D           | WP_040122118.1    | JV59_RS22990 |
|                          | PAAR-like (DUF4150)                                                | UPI0001B95600 (annotated as a pseudogene in RefSeq) | VIC_RS08805 | WP_021455353.1    | G3U99_RS15395 | WP_021455353.1    | JV59_RS10110 |
| Antibacterial effector   | VP1390-like                                                        | WP_006961156.1                                      | VIC_RS16350 | WP_021456525.1    | G3U99_RS23785 | WP_040121705.1    | JV59_RS20045 |
|                          | Lysozyme-like                                                      | WP_006961879.1                                      | VIC_RS19190 | N/A               | N/A           | WP_040122119.1    | JV59_RS22995 |
|                          | MIX domain; TMs                                                    | WP_201765497.1                                      | VIC_RS12080 | N/D               | N/D           | WP_235284713.1    | JV59_RS24085 |
|                          | MIX domain; Pyocin_S; Colicin E9-like nuclease                     | WP_039951132.1                                      | VIC_RS01010 | N/A               | N/A           | N/A               | N/A          |
|                          | MIX domain; Colicin A-like pore-forming                            | N/A                                                 | N/A         | N/A               | N/A           | WP_052131801.1    | JV59_RS24930 |
|                          | Unknown                                                            | N/A                                                 | N/A         | WP_021456284.1    | G3U99_RS12660 | N/A               | N/A          |
| Anti-eukaryotic effector | MIX domain                                                         | WP_006962196.1                                      | VIC_RS20535 | N/A               | N/A           | N/A               | N/A          |
|                          | MIX domain                                                         | N/A                                                 | N/A         | WP_021456290.1    | G3U99_RS26335 | WP_235284669.1    | JV59_RS27320 |
| Effector accessory       | MIX domain-containing co-effector                                  | WP_006961158.1                                      | VIC_RS16360 | N/D               | N/D           | WP_040121707.1    | JV59_RS20055 |
|                          | Encoded upstream of anti-eukaryotic MIX domain-containing effector | WP_006962197.1                                      | VIC_RS20540 | N/D               | N/D           | WP_038511497.1    | JV59_RS07245 |
| Unknown                  | DEAD/DEAH box helicase                                             | N/D                                                 | N/D         | WP_021455387.1    | G3U99_RS17670 | N/A               | N/A          |

252 N/A, no homolog is encoded in the genome; N/D, a homolog is encoded in the genome but not detected in the mass-  
 253 spectrometry analysis; TM, transmembrane helix (according to phobius)

254

255 **T6SS2 secretomes:** We identified ten, nine, and six proteins that were significantly enriched in  
 256 the secretomes of wild-type strains BAA-450, OCN008, and OCN014, respectively, compared to  
 257 their T6SS2<sup>-</sup> ( $\Delta$ tssM2) mutants (**Fig. 6, Table 2, and Dataset S3-S5**). These include the  
 258 secreted tube-spike structural components Hcp2 and VgrG2. We predict that all the other  
 259 identified, non-structural proteins, which are encoded outside the T6SS2 gene cluster (**Fig. S2**),  
 260 are novel anti-eukaryotic effectors (excluding the phage shock protein, WP\_021456780.1, which  
 261 is probably a phage protein and not a T6SS effector). In support of this prediction, none of these  
 262 proteins is encoded next to a gene that could encode for a cognate immunity protein. Moreover,  
 263 some are similar to previously described virulence toxins, such as WP\_006960006.1 containing  
 264 a predicted YopT-like cysteine protease domain (YopT is a type III secretion system virulence  
 265 effector from *Yersinia* [51]). No putative effectors have a predicted signal peptide for the Sec or  
 266 Tat secretion systems that could account for their secretion, according to SignalP 6.0 [52]  
 267 analyses.

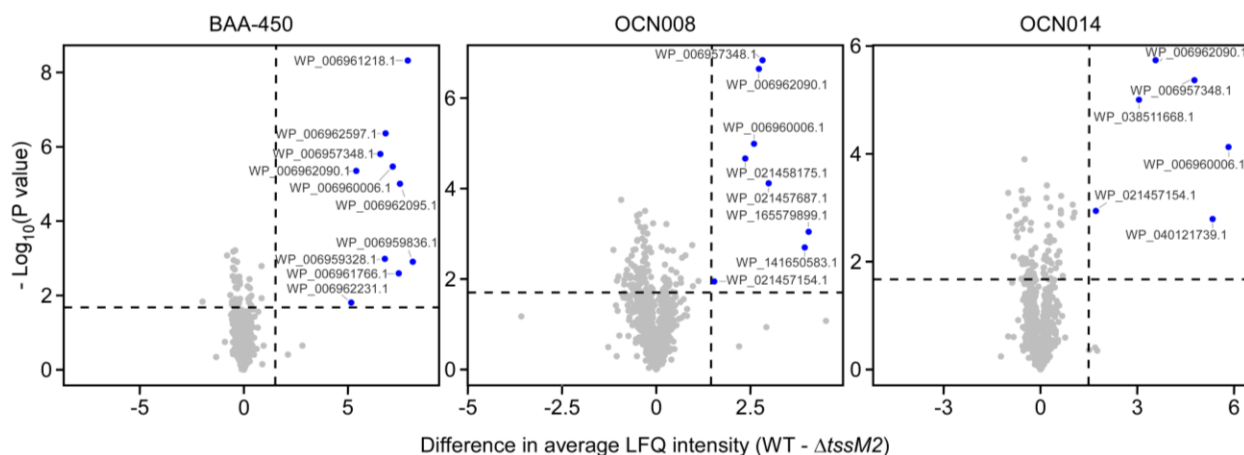

268 **Fig. 6. *Vibrio coralliilyticus* T6SS2 effector repertoires.** Volcano plots summarizing the  
 269 comparative proteomics of proteins identified in the media of the three indicated *Vcor* strains  
 270 with an active T6SS2 (WT, wild-type) or an inactive T6SS2 ( $\Delta tssM2$ ), using label-free  
 271 quantification (LFQ). The average LFQ signal intensity difference between the WT and  $\Delta tssM2$   
 272 strains is plotted against the  $-\text{Log}_{10}$  of Student's *t* test *P* values ( $n = 3$  biological replicates).  
 273 Proteins that were significantly more abundant in the secretome of the WT strains (difference in  
 274 average LFQ intensities  $> 1.6$ ; *P* value  $< 0.02$ ; with a minimum of two Razor unique peptides  
 275 and Score  $> 15$ ) are denoted in blue.

276

277 **Table 2. *Vibrio coralliilyticus* T6SS2 secretomes identified by comparative proteomics**

| Predicted role           | Predicted activity or domain                              | BAA-450           |                | OCN008            |               | OCN014            |              |
|--------------------------|-----------------------------------------------------------|-------------------|----------------|-------------------|---------------|-------------------|--------------|
|                          |                                                           | Protein accession | Gene locus     | Protein accession | Gene locus    | Protein accession | Gene locus   |
| T6SS structural          | Hcp                                                       | WP_006962090.1    | VIC_RS20130    | WP_006962090.1    | G3U99_RS13135 | WP_006962090.1    | JV59_RS07745 |
|                          | VgrG                                                      | WP_006962095.1    | VIC_RS20150    | WP_021458175.1    | G3U99_RS13110 | WP_038511668.1    | JV59_RS07720 |
| Anti-eukaryotic effector | CNF-like <sup>a</sup> (CoVe1)                             | WP_006957348.1    | VIC_RS01360    | WP_006957348.1    | G3U99_RS07885 | WP_006957348.1    | JV59_RS02730 |
|                          | (p)ppGpp synthetase / hydrolase <sup>a</sup> (CoVe2)      | WP_006959328.1    | VIC_RS09310    | WP_021457154.1    | G3U99_RS15865 | WP_021457154.1    | JV59_RS10570 |
|                          | Cysteine peptidase <sup>a</sup> (CoVe3)                   | WP_006959836.1    | VIC_RS11210    | N/D               | N/D           | N/D               | N/D          |
|                          | peptidase_C58-like super family <sup>b</sup> ; TM (CoVe4) | WP_006960006.1    | VIC_RS11685    | WP_006960006.1    | G3U99_RS19905 | WP_006960006.1    | JV59_RS23695 |
|                          | Unknown (CoVe5)                                           | WP_006961218.1    | VIC_RS16620    | WP_165579899.1    | G3U99_RS23535 | WP_040121739.1    | JV59_RS20315 |
|                          | ADP-ribosyltransferase <sup>b</sup> (CoVe6)               | WP_006961766.1    | VIC_RS18765    | WP_021457687.1    | G3U99_RS21080 | N/A               | N/A          |
|                          | Peptidase_26-like <sup>b</sup> (CoVe7)                    | WP_006962231.1    | VIC_RS20705    | N/D               | N/D           | N/D               | N/D          |
|                          | TM (CoVe8)                                                | WP_006962597.1    | VIC_RS22130    | N/D               | N/D           | N/D               | N/D          |
| Unknown (CoVe9)          | N/A                                                       | N/A               | WP_141650583.1 | G3U99_RS19765     | N/A           | N/A               |              |
| Unknown                  | Phage shock protein PspA                                  | N/D               | N/D            | WP_021456780.1    | G3U99_RS10060 | N/D               | N/D          |

278 N/A, no homolog is encoded in the genome; N/D, a homolog is encoded in the genome but not detected in the mass-  
 279 spectrometry analysis; TM, transmembrane helix (according to phobius); <sup>a</sup>, according to HHpred; <sup>b</sup>, according to NCBI  
 280 CDD

281

## 282 T6SS2 effectors are novel anti-eukaryotic toxins

283 Since most of the T6SS1 effectors we identified are homologs of previously described effectors,  
284 we focused on the novel T6SS2 effectors for subsequent analyses. Altogether, the identified  
285 *Vcor* T6SS2 effector repertoire comprises nine putative novel effectors, which we named  
286 *Corallilyticus* Virulence effector 1 to 9 (CoVe1-9): CoVe1, 2, 4, and 5 were identified in the  
287 secretomes of all three strains; CoVe6 was identified in the secretomes of BAA-450 and  
288 OCN008; CoVe3, 7, and 8 were identified only in the secretome of BAA-450; and CoVe9 was  
289 identified only in the secretome of OCN008 (**Table 2**).

290 Six of the nine CoVes contain domains with predicted toxic activities (**Table 2**), including  
291 peptidase [51], ADP-ribosyltransferase [53], cytotoxic necrotizing factor (CNF)-like deamidase  
292 [54], and (p)ppGpp synthetase/hydrolase [55]. However, CoVe5, 8, and 9 sequence analyses  
293 did not reveal significant similarity to any previously investigated toxin, suggesting that they  
294 harbor novel toxic domains.

295 We sought to investigate these putative effectors. First, we set out to further validate their  
296 T6SS2-dependent secretion using a standard secretion assay. To this end, we cloned the nine  
297 putative effectors (CoVe1-8 from strain BAA-450 and CoVe9 from strain OCN008) into an  
298 arabinose-inducible expression plasmid, fused to a C-terminal FLAG tag, and monitored their  
299 secretion to the media from *Vcor* strains. As shown in **Fig. S3**, T6SS2-dependent secretion of all  
300 CoVes, except CoVe3, was evident upon ectopic over-expression from a plasmid in their  
301 respective encoding *Vcor* strain. Since CoVe3 T6SS2-dependent secretion was observed in the  
302 more sensitive comparative proteomics approach when endogenously expressed from the  
303 bacterial chromosome (**Fig. 6**), it is possible that its over-expression from a plasmid hampered  
304 the secretion; alternatively, the C-terminal tag that we added to allow CoVe immunoblot  
305 detection may have interfered with CoVe3 secretion.

306 Next, we tested our hypothesis that these novel effectors target eukaryotes. In support of this  
307 hypothesis, we found that all nine effectors are toxic when ectopically expressed from a  
308 galactose-inducible plasmid in a eukaryotic heterologous model organism, the yeast  
309 *Saccharomyces cerevisiae* [56,57] (**Fig. 7A**). In contrast, these effectors were not toxic when  
310 expressed from an arabinose-inducible plasmid in *E. coli*, used as a surrogate model bacterium  
311 (**Fig. 7B** and **Fig. S4**). These results indicate that T6SS2 secretes an arsenal of novel effectors  
312 with anti-eukaryotic activities.

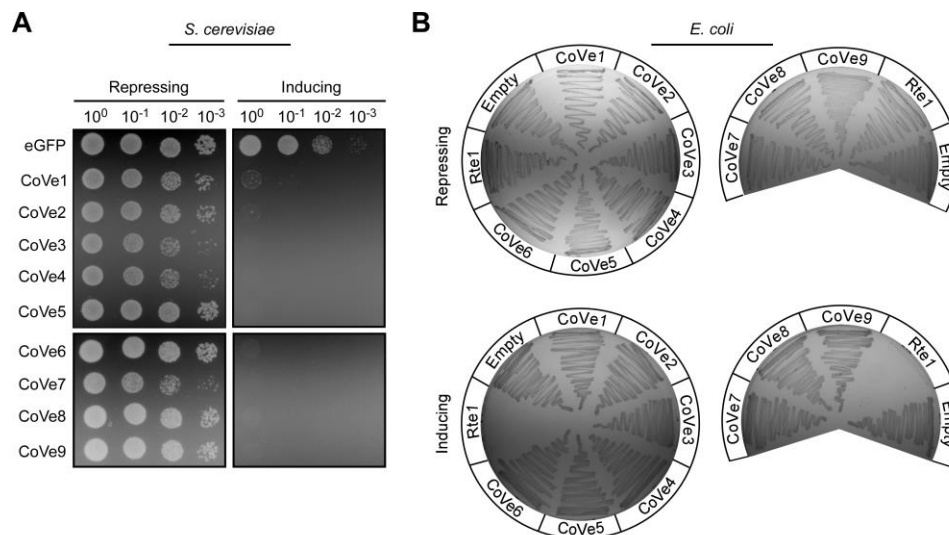

313 **Fig. 7. *Vibrio coralliilyticus* T6SS2 effectors are toxic in eukaryotic cells. (A)** CoVes are  
 314 toxic in yeast. Tenfold serial dilutions of *Saccharomyces cerevisiae* strains containing plasmids  
 315 for the galactose-inducible expression of the indicated CoVes, or eGFP used as a negative  
 316 control, were spotted on repressing (2% [wt/vol] glucose) or inducing (2% [wt/vol] galactose and  
 317 1% [wt/vol] raffinose) agar plates. eGFP, enhanced GFP. **(B)** CoVes are not toxic to bacteria.  
 318 *Escherichia coli* strains containing plasmids for the arabinose-inducible expression of the  
 319 indicated, C-terminally FLAG-tagged CoVes, the *V. campbellii* antibacterial T6SS effector Rte1  
 320 used as a positive control, or an empty plasmid (Empty) were streaked onto repressing (0.4%  
 321 [wt/vol] glucose) or inducing (0.001% [wt/vol] arabinose) agar plates. Results from a  
 322 representative experiment out of at least three independent experiments are shown.

323

324 *T6SS2 effectors are differentially distributed in Vibrio coralliilyticus genomes*

325 We and others previously showed that T6SS effector repertoires can be divided into core  
 326 effectors present in all strains harboring the system and accessory effectors encoded only by a  
 327 subset of strains [25,58,59]. Therefore, we sought to determine the distribution of CoVes in *Vcor*  
 328 genomes. Interestingly, seven of the nine CoVes are found in all available RefSeq *Vcor*  
 329 genomes (**Fig. 8** and **Dataset S6**). We propose that these seven CoVes constitute the core  
 330 effector repertoire of the *Vcor* T6SS2. In contrast, two effectors, CoVe6 and CoVe9, are found  
 331 only in a subset of strains, suggesting that they are part of the accessory T6SS2 effector  
 332 repertoire. Interestingly, homologs of CoVe2 and CoVe8 are also found in all *Vcor* genomes  
 333 (**Fig. S2** and **Dataset S6**). Even though these homologs were not identified in our comparative  
 334 proteomics analyses, it is possible that they are also T6SS2 effectors.

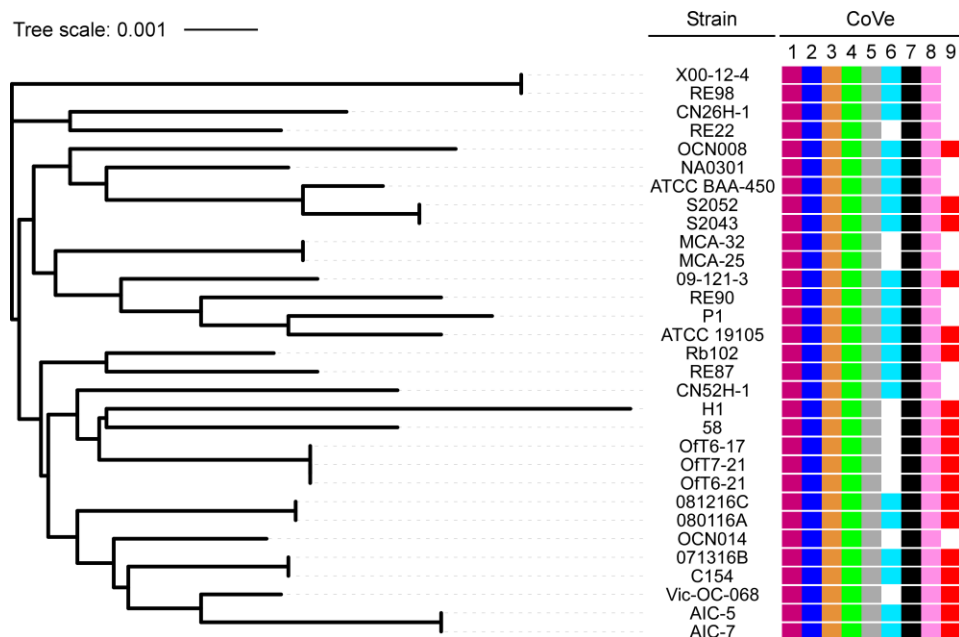

335 **Fig. 8. The *Vibrio coralliilyticus* T6SS2 effector repertoire can be divided into core and**  
 336 **accessory arsenals.** Distribution of T6SS2 CoVe1-9 effectors in RefSeq *Vcor* genomes. The  
 337 phylogenetic tree is based on DNA sequences of *rpoB*, coding for DNA-directed RNA  
 338 polymerase subunit  $\beta$ . The evolutionary history was inferred using the neighbor-joining method.

339

## 340 Discussion

341 *Vibrio coralliilyticus* (*Vcor*) is a pathogen that inflicts devastating ecological and economic  
342 losses. Although environmental conditions, such as high temperatures, have been associated  
343 with increased virulence and a pathogenic lifestyle, the exact virulence factors it uses remain  
344 poorly understood. Here, we systematically analyzed the T6SSs in the *Vcor* pan-genome. We  
345 revealed two omnipresent T6SSs, T6SS1 and T6SS2, which are regulated by temperature and  
346 appear to contribute to *Vcor* virulence. Whereas T6SS1 mediates antibacterial toxicity and thus  
347 possibly contributes to host colonization indirectly, T6SS2 secretes an array of novel anti-  
348 eukaryotic effectors and appears to play a direct role in virulence.

349 T6SS1 plays a role in interbacterial competition, possibly contributing to the elimination of host  
350 microbiota during host colonization. The T6SS1 effectors identified in our comparative  
351 proteomics analyses are homologs of effectors previously reported in similar T6SSs of other  
352 vibrios [22,28,45,60] or that have been predicted based on the presence of the MIX domain that  
353 defines a widespread class of polymorphic T6SS effectors [22,45]. Therefore, we did not  
354 investigate these effectors further in this work.

355 A recent report implicated prophage induction by LodAB-mediated hydrogen peroxide  
356 production as a mechanism *Vcor* uses to outcompete non-pathogenic competitors in the host  
357 [61]. Although it is plausible that such competition is mediated by a combination of contact-  
358 independent mechanisms, such as the abovementioned prophage induction, and contact-  
359 dependent mechanisms, such as the T6SS1-mediated competition, the *Vcor* strains  
360 investigated in our study lack LodAB homologs. Moreover, an Orthologous average nucleotide  
361 identity (orthoANI) analysis suggested that the SCSIO 43001 strain containing LodAB does not  
362 belong to the *Vcor* species ([Dataset S1](#)). Therefore, we propose that the omnipresent,  
363 antibacterial T6SS1 plays a major role in the ability of pathogenic *Vcor* strains to colonize their  
364 host.

365 T6SS2 secretes an array of anti-eukaryotic effectors and mediates toxicity during infection of a  
366 model host, *Artemia* nauplii, and during infection of macrophages. Because T6SS2 is induced at  
367 high temperatures, in correlation with the onset of *Vcor* virulence, we propose that it plays a role  
368 in the colonization and toxicity towards its natural hosts, coral and shellfish larvae. In future  
369 work, we will investigate the contribution of T6SS2 to *Vcor*'s virulence in these natural hosts,  
370 and we will also determine whether it targets the coral itself or its endosymbiotic dinoflagellates.

371 Notably, only a few anti-eukaryotic T6SS effectors are known [35,36]. Although we recently  
372 revealed anti-eukaryotic effectors in vibrios, belonging to the RIX effector class [42], the CoVes  
373 do not belong to any known polymorphic effector class and appear to be new T6SS effectors  
374 that have not been previously described. Even though their activities and cellular targets remain  
375 to be investigated, six CoVes harbor putative catalytic domains that have previously been  
376 implicated in virulence. Future investigations will reveal their mechanism of action and target  
377 inside eukaryotic cells.

378 Although we did not observe T6SS2 secretion in the poor GASW media in *Vcor* OCN008, this  
379 system contributed to this strain's virulence during the infection of *Artemia* nauplii. Because the  
380 *Artemia* infection assays were also performed in poor media (i.e., Instant Ocean), an unknown  
381 host factor possibly contributes to the system's activation during infection. Notably, our results  
382 suggest that additional factors contribute to the virulence towards *Artemia*, since inactivation of  
383 T6SS2 did not completely abolish toxicity in this host. Interestingly, the results of the BMDM  
384 infection assays indicate that the *Vcor* T6SS2 is also active at high temperatures of 37°C, which  
385 are infrequent in marine environments. It appears that under these conditions, the anti-  
386 eukaryotic toxicity of *Vcor* strains is mediated predominantly by T6SS2, since its inactivation  
387 abrogated toxicity to BMDMs. This observation suggests that *Vcor* might also be virulent to

388 warm-blooded organisms, although, at this time, we have no direct evidence to support this  
389 hypothesis.

390

## 391 **Materials and Methods**

392 **Strains and media:** For a complete list of strains used in this study, see [Table S1](#). *Escherichia*  
393 *coli* strain DH5 $\alpha$  ( $\lambda$ -pir) was grown in 2xYT broth (1.6% [wt/vol] tryptone, 1% [wt/vol] yeast  
394 extract, and 0.5% [wt/vol] NaCl) or on Lysogeny broth (LB) agar plates (1.5% [wt/vol]) at 37°C.  
395 The media were supplemented with chloramphenicol (10  $\mu$ g/ml) to maintain plasmids when  
396 needed. To repress expression from arabinose-inducible *Pbad* promoters, 0.4% (wt/vol) D-  
397 glucose was added to the media. To induce expression from *Pbad*, L-arabinose was added to  
398 the media at 0.001 or 0.1% (wt/vol), as indicated.

399 *Vibrio coralliilyticus* (*Vcor*) strains ATCC BAA-450, OCN008 and OCN014, and their derivatives  
400 were grown in Marine Lysogeny broth (MLB; LB containing 3% [wt/vol] NaCl) or on GASW-Tris  
401 agar plates (20.8 [g/l] NaCl, 0.56 [g/l] KCl, 4.8 [g/l] MgSO<sub>4</sub>·7H<sub>2</sub>O, 4 [g/l] MgCl<sub>2</sub>·6H<sub>2</sub>O, 0.01 [g/l]  
402 K<sub>2</sub>HPO<sub>4</sub>, 0.001 [g/l] FeSO<sub>4</sub>·7H<sub>2</sub>O, 2 [g/l] Instant Ocean sea salts, 6.33 [g/l] Tris base [C<sub>4</sub>H<sub>11</sub>NO<sub>3</sub>],  
403 4 [g/l] tryptone, 2 [g/l] yeast extract, 0.2% [vol/vol] glycerol, and 1.5% [wt/vol] agar; pH was  
404 adjusted to 8.3 with HCl) at 30°C. For colony selection after plasmid conjugation (see below),  
405 *Vcor* was grown on TCBS agar (Millipore, #86348) plates. L-arabinose (0.01% [wt/vol]) was  
406 added to the media to induce expression from *Pbad*.

407 *Vibrio natriegens* ATCC 14048 were grown on Marine Minimal Media (MMM) agar plates (2%  
408 [wt/vol] NaCl, 0.4% [wt/vol] galactose, 5 mM MgSO<sub>4</sub>, 7 mM K<sub>2</sub>SO<sub>4</sub>, 77 mM K<sub>2</sub>HPO<sub>4</sub>, 35 mM  
409 KH<sub>2</sub>PO<sub>4</sub>, 2 mM NH<sub>4</sub>Cl, and 1.5% [wt/vol] agar) at 30°C. The media were supplemented with  
410 chloramphenicol (10  $\mu$ g/ml) to select for or maintain plasmids when necessary.

411 *Saccharomyces cerevisiae* were grown in Yeast Extract–Peptone–Dextrose broth (YPD; 1%  
412 [wt/vol] yeast extract, 2% [wt/vol] peptone, and 2% [wt/vol] glucose) or on YPD agar plates (2%  
413 [wt/vol]) at 30°C. Yeast containing plasmids that provide prototrophy to leucine were grown in  
414 Synthetic Dropout media (SD; 6.7 [g/l] yeast nitrogen base without amino acids, 1.4 [g/l] yeast  
415 synthetic dropout medium supplement (Sigma)) supplemented with histidine (2 [ml/l] from a 1%  
416 [wt/vol] stock solution), tryptophan (2 [ml/l] from a 1% [wt/vol] stock solution), uracil (10 [ml/l]  
417 from a 0.2% [wt/vol] stock solution), and glucose (4% [wt/vol]). For galactose-inducible  
418 expression from a plasmid, cells were grown in SD media or on SD agar plates supplemented  
419 with galactose (2% [wt/vol]) and raffinose (1% [wt/vol]).

420 **Plasmid construction:** For a complete list of plasmids used in this study, see [Table S2](#). For a  
421 complete list of primers used in this study, see [Table S3](#). To enable strong, arabinose-inducible  
422 protein expression in *Vcor*, we constructed the plasmid pKara1. To this end, we amplified the  
423 region between the *araC* cassette and *rrnB* T1 terminator, including a C-terminally FLAG-tagged  
424 sfGFP gene, from the plasmid psfGFP [60], and introduced it 220 bp upstream of the gene  
425 encoding the fluorescent protein DsRed in pVSV208 [62], using the Gibson assembly method.

426 For expression in bacteria, the coding sequences (CDS) of the indicated genes of interest were  
427 amplified by PCR from the respective genomic DNA of the encoding bacterium. Next, amplicons  
428 were inserted into the multiple cloning site (MCS) of pBAD33.1<sup>F</sup>, or in place of the sfGFP gene  
429 within pKara1, using the Gibson assembly method [63], in-frame with the C-terminal FLAG tag.  
430 Plasmids were introduced into *E. coli* DH5 $\alpha$  ( $\lambda$ -pir) by electroporation and into vibrios via  
431 conjugation. Transconjugants were selected on TCBS agar (Millipore) plates supplemented with  
432 chloramphenicol and then counter-selected on GASW agar plates containing chloramphenicol.

433 For galactose-inducible expression in yeast, genes were inserted into the MCS of the shuttle  
434 vector pGML10 (Riken) using the Gibson assembly method, in-frame with a C-terminal Myc tag.  
435 Yeast transformations were performed using the lithium acetate method, as described  
436 previously [64].

437 **Construction of deletion strains:** To delete genes in *Vcor* BAA-450, OCN008, and OCN014,  
438 1 kb sequences upstream and downstream of each gene to be deleted were cloned together  
439 into the MCS of pDM4, a Cm<sup>R</sup>OriR6K suicide plasmid. The pDM4 constructs were transformed  
440 into *E. coli* DH5 $\alpha$  ( $\lambda$ -pir) by electroporation and then conjugated into *Vcor* strains.  
441 Transconjugants were selected on TCBS agar plates supplemented with chloramphenicol and  
442 then counter-selected on agar plates containing 15% (wt/vol) sucrose for loss of the *sacB*-  
443 containing plasmid. Deletions were confirmed by PCR.

444 ***Vibrio* protein secretion assays:** Secretion and expression assays were performed as  
445 previously reported [24], with minor modifications. *Vcor* strains were grown for 16 hours in MLB  
446 supplemented with antibiotics to maintain plasmids when necessary. Bacterial cultures were  
447 diluted four-fold in fresh media and incubated for two additional hours at 28°C. Then, the  
448 cultures were normalized to an optical density at 600 nm (OD<sub>600</sub>) of 0.18 in 5 ml of MLB or  
449 GASW media, as indicated. When protein expression from an arabinose-inducible plasmid was  
450 required, the media were supplemented with chloramphenicol and 0.01% (wt/vol) L-arabinose.  
451 The cultures were then incubated with continuous shaking (220 rpm) at 19°C, 23°C, 28°C or  
452 31°C, as indicated, for four hours. For expression fractions, 0.5 OD<sub>600</sub> units were harvested, and  
453 cell pellets were resuspended in 30  $\mu$ l of 2x Tris-glycine SDS sample buffer (Novex, Life  
454 Sciences) with 5% (vol/vol)  $\beta$ -mercaptoethanol. For secretion fractions, supernatant volumes  
455 equivalent to 5 OD<sub>600</sub> units were filtered (0.22  $\mu$ m), and proteins were precipitated using the  
456 deoxycholate and trichloroacetic acid method [65]. The precipitated proteins were washed twice  
457 with cold acetone and air-dried before being resuspended in 20  $\mu$ l of 100 mM Tris-Cl (pH = 8.0)  
458 and 20  $\mu$ l of 2x Tris-glycine SDS sample buffer containing 5% (vol/vol)  $\beta$ -mercaptoethanol.  
459 Protein samples were incubated at 95°C for 10 minutes before being resolved on TGX Stain-  
460 free gels (Bio-Rad). The proteins were transferred onto 0.2  $\mu$ m nitrocellulose membranes using  
461 Trans-Blot Turbo Transfer (Bio-Rad), following the manufacturer's protocol. Membranes were  
462 then immunoblotted with custom-made  $\alpha$ -Hcp2 (GenScript; polyclonal antibodies raised in  
463 rabbits against the peptides CGEGGKIEKGPVEVF or CVMTKPNREGSGADP; the latter was  
464 used only in the experiment shown in Fig. 2A), Custom-made polyclonal  $\alpha$ -VgrG1 [66],  
465 monoclonal  $\alpha$ -FLAG (Sigma-Aldrich, F1804), or Direct-Blot™ HRP anti-*E. coli* RNA polymerase  
466 sigma 70 (mouse mAb #663205; BioLegend; referred to as  $\alpha$ -RNAP) antibodies at a dilution of  
467 1:1000. Protein signals were detected using enhanced chemiluminescence (ECL) reagents with  
468 a Fusion FX6 imaging system (Vilber Lourmat).

469 **Mass spectrometry analyses:** Sample preparations for mass spectrometry were performed as  
470 described in the "*Vibrio* protein secretion assays" section. After the acetone wash step, samples  
471 were shipped to the Smoler Proteomics Center at the Technion, Israel, for analysis. Precipitated  
472 proteins were washed twice in 80% (vol/vol) cold acetone. The protein pellets were dissolved in  
473 8.5 M Urea, 400 mM ammonium bicarbonate, and 10 mM DTT. Protein concentrations were  
474 estimated using the Bradford assay. The proteins were reduced at 60°C for 30 minutes and then  
475 modified with 35.2 mM iodoacetamide in 100 mM ammonium bicarbonate for 30 minutes at  
476 room temperature in the dark. The proteins were digested overnight at 37°C in 1.5 M urea and  
477 66 mM ammonium bicarbonate with modified trypsin (Promega) at a 1:50 (M/M) enzyme-to-  
478 substrate ratio. An additional trypsinization step was performed for four hours. The resulting  
479 tryptic peptides were analyzed by LC-MS/MS using Q Exactive HF mass spectrometer (Thermo)  
480 fitted with a capillary HPLC (Evosep). The peptides were loaded onto a 15 cm ID 150 1.9-  
481 micron (Batch no. E1121-3-24) column of Evosep. The peptides were eluted with the built-in

482 Xcalibur 15 SPD (88 min) method. Mass spectrometry was performed in a positive mode using  
483 repetitively full MS scan ( $m/z$  350–1200) followed by High energy Collision Dissociation (HCD)  
484 of the 20 most dominant ions selected from the full MS scan. A dynamic exclusion list was  
485 enabled with exclusion duration of 20 seconds.

486 The mass spectrometry data were analyzed with the MaxQuant software 2.1.1.0  
487 ([www.maxquant.org](http://www.maxquant.org)) using the Andromeda search engine [67] against the relevant *Vcor* strains  
488 from the Uniprot database, with a mass tolerance of 4.5 ppm for the precursor masses and 4.5  
489 ppm for the fragment ions. Peptide- and protein-level false discovery rates (FDRs) were filtered  
490 to 1% using the target-decoy strategy. The protein table was filtered to eliminate identities from  
491 the reverse database and common contaminants. The data were quantified by label-free  
492 analysis using the same software, based on extracted ion currents (XICs) of peptides, enabling  
493 quantitation from each LC/MS run for each peptide identified in any of the experiments.  
494 Statistical analyses of the identification and quantization results were done using the Perseus  
495 1.6.7.0 software [68]. The mass spectrometry proteomics data have been deposited in the  
496 ProteomeXchange Consortium via PRIDE [69].

497 **Bacterial competition assays:** Bacterial competition assays were performed as previously  
498 described [24], with minor modifications. Attacker and prey strains were grown for 16 hours in  
499 appropriate media. In the morning, *Vcor* attacker strains were diluted 1:10 into fresh media and  
500 incubated for an additional hour at 28°C. Attacker and prey cultures were then normalized to an  
501 OD<sub>600</sub> of 0.5 and mixed at a 4:1 (attacker:prey) ratio in triplicate. Next, the mixtures were spotted  
502 (25 µl) on MLB agar competition plates and incubated at 28°C for 4 h. The colony-forming units  
503 (CFU) of the prey strains at  $t = 0$  h were determined by plating tenfold serial dilutions on  
504 selective media plates. After 4 hours of co-incubation on competition plates, the bacteria were  
505 harvested, and the CFUs of the surviving prey strains were determined as described above.  
506 Prey strains contained a pBAD33.1 plasmid to allow selective growth on plates containing  
507 chloramphenicol.

508 ***Vibrio coralliilyticus* growth assays:** Triplicates *Vcor* cultures grown for 16 hours were  
509 normalized to OD<sub>600</sub> = 0.01 in MLB and transferred to a 96-well plate (200 µl per well). The 96-  
510 well plate was incubated in a microplate reader (BioTek SYNERGY H1) at 28°C with continuous  
511 shaking (205 cpm). Growth was measured as OD<sub>600</sub> in 10-minute intervals.

512 ***Artemia* infection assays:** *Artemia* infection assays were performed as previously reported  
513 [41], with minor modifications. *Artemia salina* eggs (Artemio Pur; JBL) were incubated in  
514 deionized distilled water containing chloramphenicol (10 µg/ml), kanamycin (100 µg/ml), and  
515 ampicillin (100 µg/ml) at 28°C with continuous rotation for an hour. The eggs were washed four  
516 times with Instant Ocean solution (3.3% [wt/vol]; Aquarium Systems) and then incubated for 24  
517 hours with continuous rotation at 28°C. Hatched *Artemia* nauplii were transferred into sterile 48-  
518 well plates (two nauplii per well in 400 µl Instant Ocean). Approximately  $5 \times 10^7$  bacteria were  
519 added to each well, and the plates were incubated at 28°C under 12-hour light and dark cycles.  
520 *Artemia* survival was determined at the indicated timepoints post-infection. An *Artemia* nauplius  
521 that did not move for 10 seconds was defined as non-viable. Each bacterial strain was added to  
522 8 wells (16 nauplii). Survival results are provided as grouped data from four independent  
523 experiments. Percent survival was calculated as surviving subjects out of the subjects at risk for  
524 each time point.

525 **BMDM infection assays:** Bone marrow cells from 6-8 week-old mice were isolated, and bone  
526 marrow-derived macrophages (BMDMs) were obtained after a 7-day differentiation, as  
527 previously described [70]. *Vcor* strains were grown for 16 hours in MLB. In the morning,  
528 bacterial cultures were diluted tenfold into fresh media and incubated for an additional hour at  
529 28°C. Approximately  $3.5 \times 10^4$  BMDMs were seeded into 96-well plates in triplicates in 1%



530 (vol/vol) FBS and penicillin-streptomycin-free DMEM media and then infected with the  
531 indicated *Vcor* strains at a multiplicity of infection (MOI) ~ 4. Plates were centrifuged for 5  
532 minutes at 400 x *g*. Propidium iodide (PI; 1 µg/ml) was added to the medium 30 minutes prior to  
533 infection, and its uptake kinetics were assessed every 15 minutes using real-time microscopy  
534 (Incucyte SX5) during incubation at 37°C. The data were analyzed using the Incucyte SX5  
535 analysis software and exported to Graphpad PRISM. Normalization was performed according to  
536 the maximal PI-positive object count to calculate the percentage of dead cells [70].

537 **Yeast toxicity assays:** Toxicity assays in yeast were performed as previously described [64].  
538 Briefly, yeast cells were cultured for 16 hours in SD media supplemented with 4% glucose  
539 (wt/vol). Bacterial cultures were washed twice with sterile deionized distilled water and  
540 normalized to an OD<sub>600</sub> of 1.0 in sterile deionized water. Then, tenfold serial dilutions were  
541 spotted onto SD agar plates containing 4% (wt/vol) glucose (repressing plates) or 2% (wt/vol)  
542 galactose and 1% (wt/vol) raffinose (inducing plates). The plates were incubated at 28°C for two  
543 days.

544 **Protein expression in *E. coli*:** Overnight-grown bacterial cultures of *E. coli* DH5α (λ-pir) strains  
545 carrying pBAD33.1 arabinose-inducible expression plasmids were grown in 2xYT broth  
546 supplemented with chloramphenicol. Bacterial cultures were normalized to an OD<sub>600</sub> = 0.5 in 3  
547 ml fresh 2xYT with chloramphenicol and incubated with continuous shaking (220 rpm) at 37°C  
548 for 2 hours. Then, L-arabinose was added to a final concentration of 0.1% (wt/vol) to induce  
549 protein expression, and the cultures were incubated for two additional hours. Cells equivalent to  
550 0.5 OD<sub>600</sub> units were harvested, and their pellets were resuspended in 50 µl of 2x Tris-glycine  
551 SDS sample buffer (Novex, Life Sciences) supplemented with 5% (vol/vol) β-mercaptoethanol.  
552 Subsequently, the samples were boiled at 95°C for 10 minutes and resolved on a TGX stain-free  
553 gel (Bio-Rad) for SDS-PAGE analysis. The proteins were transferred onto nitrocellulose  
554 membranes, which were then immunoblotted with α-FLAG (Sigma-Aldrich, F1804) antibodies at  
555 a 1:1000 dilution. Finally, protein signals were detected using ECL in a Fusion FX6 imaging  
556 system (Vilber Lourmat). The loading control for total protein lysates was visualized as the  
557 fluorescence of activated trihalo compounds found in the gel.

558 ***E. coli* toxicity assays:** To determine the toxicity of *Vcor* proteins in bacteria, *E. coli* DH5α (λ-  
559 pir) strains carrying pBAD33.1 arabinose-inducible expression plasmids were streaked onto LB  
560 agar plates supplemented with chloramphenicol and either 0.4% (wt/vol) glucose (repressing  
561 plates) or 0.001% (wt/vol) L-arabinose (inducing plates). Plates were incubated for 16 hours at  
562 37°C.

563 **Identifying T6SS gene clusters in *Vibrio coralliilyticus*:** A local database containing the  
564 RefSeq bacterial nucleotide and protein sequences was generated (last updated on August 21,  
565 2023). *Vcor* genomes were retrieved from the local database, and OrthoANI [71] was performed  
566 as described previously [72]. The *Vcor* strain SCSIO 43001 genome (assembly accession  
567 GCF\_024449095.1) was removed from the dataset because it showed OrthoANI values <95%.  
568 The *Vcor* strain RE22 (assembly accession GCF\_001297935.1) was removed because an  
569 updated version of strain RE22 was found (assembly accession GCF\_003391375.1).

570 The presence of T6SS gene clusters in *Vcor* genomes was determined by following a two-step  
571 procedure described previously [50]. Briefly, in the first step, BLASTN was employed to align  
572 *Vcor* nucleotide sequences against the nucleotide sequences of representative T6SS clusters  
573 (Fig. 1 and Dataset S2). The best alignments for each nucleotide accession number were  
574 saved. In the second step, a two-dimensional matrix was generated for each T6SS gene cluster.  
575 The matrices were filled in with the percent identity values based on the positions of the  
576 alignments from the first step. The overall coverage was calculated for each T6SS gene cluster

577 in each genome. *Vcor* genomes with at least 70% overall coverage of a T6SS gene cluster were  
578 regarded as containing that T6SS gene cluster (**Dataset S2**).

579 **Identifying effector homologs in *Vibrio coralliilyticus* genomes:** BLASTP was employed to  
580 identify homologs of the T6SS2 effectors in *Vcor* genomes, as described previously [25]. The  
581 amino acid sequences of new CoVes from strains BAA-450 (WP\_006957348.1,  
582 WP\_006959328.1, WP\_006959836.1, WP\_006960006.1, WP\_006961218.1, WP\_006961766.1,  
583 WP\_006962231.1, and WP\_006962597.1) and OCN008 (WP\_141650583.1) were used as  
584 queries. The E-value threshold was set to  $10^{-12}$ , and the coverage was set to 70% based on the  
585 length of the query sequences.

586 **Constructing a phylogenetic tree:** The nucleotide sequences of the *rpoB* gene, coding for  
587 DNA-directed RNA polymerase subunit beta, were retrieved from the local RefSeq database.  
588 Phylogenetic analyses of bacterial genomes were conducted using the MAFFT 7 server  
589 ([mafft.cbrc.jp/alignment/server/](http://mafft.cbrc.jp/alignment/server/)) as described before [73]. A multiple sequence alignment was  
590 generated using MAFFT v7 FFT-NS-I [74,75]. The evolutionary history of *Vcor* genomes was  
591 inferred using the neighbor-joining method [76] with the Jukes-Cantor substitution model (JC69).  
592 The analysis included 31 nucleotide sequences and 4,029 conserved sites.

593

## 594 **Data Availability**

595 The mass spectrometry proteomics data have been deposited in the ProteomeXchange  
596 Consortium via the PRIDE [69] partner repository with the dataset identifier PXD049479.

597

## 598 **Conflict of Interest**

599 The authors declare no competing interests.

600

## 601 **Acknowledgments**

602 This project received funding from the National Science Foundation and United States-Israel  
603 Binational Science Foundation (NSF grant number 2207168 and BSF grant number 2021733 to  
604 DS, JvK, and BU) and the Israel Science Foundation (ISF grant number 1362/21 to DS and EB,  
605 and grant number 2174/22 to MG). We thank members of the Salomon, van Kessel, and  
606 Ushijima groups for valuable discussions, and Katarzyna Kanarek for preparing the pKara1  
607 plasmid. We also thank the Smoler Proteomics Center at the Technion for performing and  
608 analyzing the mass spectrometry data.

609

## 610 **Author contributions**

611 Conceptualization: BU, JvK, and DS; Formal Analysis: SM, HC, EB, and DS; Funding  
612 Acquisition: MG, BU, JvK, EB, and DS; Investigation: SM, HC, and EB; Methodology: SM, HC,  
613 and EB; Resources: MG, BU, JvK; Supervision: DS; Writing – Original Draft Preparation: SM  
614 and DS; Writing – Review and Editing: HC, MG, BU, JvK, and EB.

615

## 616 **References**

617 1. Horseman MA, Bray R, Lujan-Francis B, Matthew E. Infections Caused by Vibrionaceae.  
618 *Infect Dis Clin Pract.* 2013;21: 222–232. doi:10.1097/IPC.0b013e3182826328

- 619 2. Baker-Austin C, Oliver JD, Alam M, Ali A, Waldor MK, Qadri F, et al. *Vibrio* spp.  
620 infections. *Nat Rev Dis Prim*. 2018;4: 1–19. doi:10.1038/s41572-018-0005-8
- 621 3. Martinez-Urtaza J, Baker-Austin C, Jones JL, Newton AE, Gonzalez-Aviles GD, DePaola  
622 A. Spread of Pacific Northwest *Vibrio parahaemolyticus* Strain. *N Engl J Med*. 2013;369:  
623 1573–1574. doi:10.1056/NEJMc1305535
- 624 4. Le Roux F, Wegner KM, Baker-Austin C, Vezzulli L, Osorio CR, Amaro C, et al. The  
625 emergence of *Vibrio* pathogens in Europe: Ecology, evolution and pathogenesis (Paris,  
626 11-12 March 2015). *Front Microbiol*. 2015;6: 1–8. doi:10.3389/fmicb.2015.00830
- 627 5. Vezzulli L, Grande C, Reid PC, Hélaouët P, Edwards M, Höfle MG, et al. Climate  
628 influence on *Vibrio* and associated human diseases during the past half-century in the  
629 coastal North Atlantic. *Proc Natl Acad Sci*. 2016;113: E5062–E5071.  
630 doi:10.1073/pnas.1609157113
- 631 6. Newton A, Kendall M, Vugia DJ, Henao OL, Mahon BE. Increasing Rates of Vibriosis in  
632 the United States, 1996–2010: Review of Surveillance Data From 2 Systems. *Clin Infect*  
633 *Dis*. 2012;54: S391–S395. doi:10.1093/cid/cis243
- 634 7. Burke S, Pottier P, Lagisz M, Macartney EL, Ainsworth T, Drobniak SM, et al. The impact  
635 of rising temperatures on the prevalence of coral diseases and its predictability: A global  
636 meta-analysis. *Ecol Lett*. 2023;26. doi:10.1111/ele.14266
- 637 8. Arboleda M, Reichardt W. Epizoic communities of prokaryotes on healthy and diseased  
638 scleractinian corals in Lingayen Gulf, Philippines. *Microb Ecol*. 2009;57.  
639 doi:10.1007/s00248-008-9400-0
- 640 9. Moriarty T, Leggat W, Huggett MJ, Ainsworth TD. Coral Disease Causes, Consequences,  
641 and Risk within Coral Restoration. *Trends in Microbiology*. 2020.  
642 doi:10.1016/j.tim.2020.06.002
- 643 10. Elliff CI, Silva IR. Coral reefs as the first line of defense: Shoreline protection in face of  
644 climate change. *Marine Environmental Research*. 2017.  
645 doi:10.1016/j.marenvres.2017.03.007
- 646 11. Mera H, Bourne DG. Disentangling causation: complex roles of coral-associated  
647 microorganisms in disease. *Environmental Microbiology*. 2018. doi:10.1111/1462-  
648 2920.13958
- 649 12. Bender-Champ D, Diaz-Pulido G, Dove S. Effects of elevated nutrients and CO2  
650 emission scenarios on three coral reef macroalgae. *Harmful Algae*. 2017;65.  
651 doi:10.1016/j.hal.2017.04.004
- 652 13. Vanwonderghem I, Webster NS. Coral Reef Microorganisms in a Changing Climate.  
653 *iScience*. 2020. doi:10.1016/j.isci.2020.100972
- 654 14. Tout J, Siboni N, Messer LF, Garren M, Stocker R, Webster NS, et al. Increased  
655 seawater temperature increases the abundance and alters the structure of natural *Vibrio*  
656 populations associated with the coral *Pocillopora damicornis*. *Front Microbiol*. 2015;6.  
657 doi:10.3389/fmicb.2015.00432
- 658 15. Ben-Haim Y, Zicherman-Keren M, Rosenberg E. Temperature-regulated bleaching and  
659 lysis of the coral *Pocillopora damicornis* by the novel pathogen *Vibrio coralliilyticus*. *Appl*  
660 *Environ Microbiol*. 2003;69: 4236–42. Available:  
661 <http://www.ncbi.nlm.nih.gov/pubmed/12839805>
- 662 16. Ushijima B, Videau P, Burger AH, Shore-Maggio A, Runyon CM, Sudek M, et al. *Vibrio*

- 663 coralliilyticus strain OCN008 is an etiological agent of acute montipora white syndrome.  
664 *Appl Environ Microbiol.* 2014;80. doi:10.1128/AEM.03463-13
- 665 17. Richards GP, Watson MA, Needleman DS, Church KM, Häse CC. Mortalities of Eastern  
666 And Pacific oyster larvae caused by the pathogens *Vibrio coralliilyticus* and *Vibrio*  
667 *tubiashii*. *Appl Environ Microbiol.* 2015;81. doi:10.1128/AEM.02930-14
- 668 18. Ushijima B, Richards GP, Watson MA, Schubiger CB, Häse CC. Factors affecting  
669 infection of corals and larval oysters by *Vibrio coralliilyticus*. *PLoS One.* 2018;13.  
670 doi:10.1371/journal.pone.0199475
- 671 19. Kimes NE, Grim CJ, Johnson WR, Hasan NA, Tall BD, Kothary MH, et al. Temperature  
672 regulation of virulence factors in the pathogen *Vibrio coralliilyticus*. *ISME J.* 2012;6: 835–  
673 846. doi:10.1038/ismej.2011.154
- 674 20. Childers BM, Klose KE. Regulation of virulence in *Vibrio cholerae*: The ToxR regulon.  
675 *Future Microbiology.* 2007. doi:10.2217/17460913.2.3.335
- 676 21. Ushijima B, Videau P, Poscablo D, Stengel JW, Beurmann S, Burger AH, et al. Mutation  
677 of the *toxR* or *mshA* genes from *Vibrio coralliilyticus* strain OCN014 reduces infection of  
678 the coral *Acropora cytherea*. *Environ Microbiol.* 2016;18. doi:10.1111/1462-2920.13428
- 679 22. Dar Y, Salomon D, Bosis E. The antibacterial and anti-eukaryotic Type VI secretion  
680 system MIX-effector repertoire in *Vibrionaceae*. *Mar Drugs.* 2018;16: 433.  
681 doi:10.1016/bs.ctdb.2015.10.001
- 682 23. Pukatzki S, Ma AT, Sturtevant D, Krastins B, Sarracino D, Nelson WC, et al. Identification  
683 of a conserved bacterial protein secretion system in *Vibrio cholerae* using the  
684 *Dictyostelium* host model system. *Proc Natl Acad Sci.* 2006;103: 1528–1533.  
685 doi:10.1073/pnas.0510322103
- 686 24. Salomon D, Gonzalez H, Updegraff BL, Orth K. *Vibrio parahaemolyticus* Type VI  
687 secretion system 1 is activated in marine conditions to target bacteria, and is differentially  
688 regulated from system 2. *PLoS One.* 2013;8: e61086. doi:10.1371/journal.pone.0061086
- 689 25. Tchelet D, Keppel K, Bosis E, Salomon D. *Vibrio parahaemolyticus* T6SS2 effector  
690 repertoires. *Gut Microbes.* 2023;15. doi:10.1080/19490976.2023.2178795
- 691 26. Salomon D, Klimko JA, Trudgian DC, Kinch LN, Grishin N V., Mirzaei H, et al. Type VI  
692 secretion system toxins horizontally shared between marine bacteria. *PLoS Pathog.*  
693 2015;11: 1–20. doi:10.1371/journal.ppat.1005128
- 694 27. Speare L, Cecere AG, Guckes KR, Smith S, Wollenberg MS, Mandel MJ, et al. Bacterial  
695 symbionts use a type VI secretion system to eliminate competitors in their natural host.  
696 *Proc Natl Acad Sci U S A.* 2018;115: E8528–E8537. doi:10.1073/pnas.1808302115
- 697 28. Ray A, Schwartz N, Souza Santos M, Zhang J, Orth K, Salomon D, et al. Type VI  
698 secretion system MIX-effectors carry both antibacterial and anti-eukaryotic activities.  
699 *EMBO Rep.* 2017;18: e201744226. doi:10.15252/embr.201744226
- 700 29. Piel D, Bruto M, James A, Labreuche Y, Lambert C, Janicot A, et al. Selection of *Vibrio*  
701 *crassostreae* relies on a plasmid expressing a type 6 secretion system cytotoxic for host  
702 immune cells. *Environ Microbiol.* 2020;22. doi:10.1111/1462-2920.14776
- 703 30. Wang J, Brodmann M, Basler M. Assembly and subcellular localization of bacterial type  
704 VI secretion systems. *Annu Rev Microbiol.* 2019;73. doi:10.1146/annurev-micro-020518-  
705 115420
- 706 31. Jana B, Salomon D. Type VI secretion system: a modular toolkit for bacterial dominance.

- 707 Future Microbiol. 2019;14: fmb-2019-0194. doi:10.2217/fmb-2019-0194
- 708 32. Hernandez RE, Gallegos-Monterrosa R, Coulthurst SJ. Type VI secretion system effector  
709 proteins: Effective weapons for bacterial competitiveness. Cellular Microbiology. 2020.  
710 doi:10.1111/cmi.13241
- 711 33. Allsopp LP, Bernal P. Killing in the name of: T6SS structure and effector diversity.  
712 Microbiology. 2023;169: 001367. doi:10.1099/MIC.0.001367
- 713 34. Basler M, Pilhofer M, Henderson GP, Jensen GJ, Mekalanos JJ. Type VI secretion  
714 requires a dynamic contractile phage tail-like structure. Nature. 2012;483: 182–6.  
715 doi:10.1038/nature10846
- 716 35. Hachani A, Wood TE, Filloux A. Type VI secretion and anti-host effectors. Curr Opin  
717 Microbiol. 2016;29: 81–93. doi:10.1016/j.mib.2015.11.006
- 718 36. Monjarás Feria J, Valvano MA. An Overview of Anti-Eukaryotic T6SS Effectors. Frontiers  
719 in Cellular and Infection Microbiology. 2020. doi:10.3389/fcimb.2020.584751
- 720 37. Huang Y, Du P, Zhao M, Liu W, Du Y, Diao B, et al. Functional characterization and  
721 conditional regulation of the type VI secretion system in *Vibrio fluvialis*. Front Microbiol.  
722 2017;8: 1–15. doi:10.3389/fmicb.2017.00528
- 723 38. MacIntyre DL, Miyata ST, Kitaoka M, Pukatzki S. The *Vibrio cholerae* type VI secretion  
724 system displays antimicrobial properties. Proc Natl Acad Sci. 2010;107: 19520–19524.  
725 doi:10.1073/pnas.1012931107
- 726 39. Church SR, Lux T, Baker-Austin C, Buddington SP, Michell SL. *Vibrio vulnificus* type 6  
727 secretion system 1 contains anti-bacterial properties. PLoS One. 2016;11: 1–17.  
728 doi:10.1371/journal.pone.0165500
- 729 40. Cohen H, Baram N, Fridman CM, Edry-Botzer L, Salomon D, Gerlic M. Post-  
730 phagocytosis activation of NLRP3 inflammasome by two novel T6SS effectors. Elife.  
731 2022;11: e82766.
- 732 41. Cohen H, Fridman CM, Gerlic M, Salomon D. A *Vibrio* T6SS-Mediated Lethality in an  
733 Aquatic Animal Model. Cascales E, editor. Microbiol Spectr. 2023;11.  
734 doi:10.1128/spectrum.01093-23
- 735 42. Kanarek K, Fridman CM, Bosis E, Salomon D. The RIX domain defines a class of  
736 polymorphic T6SS effectors and secreted adaptors. Nat Commun 2023 141. 2023;14: 1–  
737 13. doi:10.1038/s41467-023-40659-2
- 738 43. Bruto M, James A, Petton B, Labreuche Y, Chenivresse S, Alunno-Bruscia M, et al. *Vibrio*  
739 *crassostreae*, a benign oyster colonizer turned into a pathogen after plasmid acquisition.  
740 ISME J. 2017;11: 1043–1052. doi:10.1038/ismej.2016.162
- 741 44. Guillemette R, Ushijima B, Jalan M, Häse CC, Azam F. Insight into the resilience and  
742 susceptibility of marine bacteria to T6SS attack by *Vibrio cholerae* and *Vibrio*  
743 *coralliilyticus*. PLoS One. 2020;15. doi:10.1371/journal.pone.0227864
- 744 45. Salomon D, Kinch LN, Trudgian DC, Guo X, Klimko JA, Grishin N V., et al. Marker for  
745 type VI secretion system effectors. Proc Natl Acad Sci. 2014;111: 9271–9276.  
746 doi:10.1073/pnas.1406110111
- 747 46. Ben-Haim Y, Thompson FL, Thompson CC, Cnockaert MC, Hoste B, Swings J, et al.  
748 *Vibrio coralliilyticus* sp. nov., a temperature-dependent pathogen of the coral *Pocillopora*  
749 *damicornis*. Int J Syst Evol Microbiol. 2003;53. doi:10.1099/ijs.0.02402-0

- 750 47. Ushijima B, Videau P, Poscablo D, Vine V, Salcedo M, Aeby G, et al. Complete genome  
751 sequence of *Vibrio coralliilyticus* strain OCN014, isolated from a diseased coral at  
752 Palmyra Atoll. *Genome Announc.* 2014;2. doi:10.1128/genomeA.01318-14
- 753 48. Neu AK, Månsson M, Gram L, Prol-García MJ. Toxicity of bioactive and probiotic marine  
754 bacteria and their secondary metabolites in artemia sp. and *Caenorhabditis elegans* as  
755 eukaryotic model organisms. *Appl Environ Microbiol.* 2014;80. doi:10.1128/AEM.02717-  
756 13
- 757 49. Austin B, Austin D, Sutherland R, Thompson F, Swings J. Pathogenicity of vibrios to  
758 rainbow trout (*Oncorhynchus mykiss*, Walbaum) and *Artemia nauplii*. *Environ Microbiol.*  
759 2005;7: 1488–1495. doi:10.1111/j.1462-2920.2005.00847.x
- 760 50. Jana B, Keppel K, Fridman CM, Bosis E, Salomon D. Multiple T6SSs, mobile auxiliary  
761 modules, and effectors revealed in a systematic analysis of the *Vibrio parahaemolyticus*  
762 pan-genome. Bordenstein S, editor. *mSystems.* 2022; e00723-22.  
763 doi:10.1128/MSYSTEMS.00723-22
- 764 51. Iriarte M, Cornelis GR. YopT, a new *Yersinia* Yop effector protein, affects the  
765 cytoskeleton of host cells. *Mol Microbiol.* 1998;29. doi:10.1046/j.1365-2958.1998.00992.x
- 766 52. Teufel F, Almagro Armenteros JJ, Johansen AR, Gíslason MH, Pihl SI, Tsirigos KD, et al.  
767 SignalP 6.0 predicts all five types of signal peptides using protein language models. *Nat*  
768 *Biotechnol.* 2022;40. doi:10.1038/s41587-021-01156-3
- 769 53. Deng Q, Barbieri JT. Molecular mechanisms of the cytotoxicity of ADP-ribosylating toxins.  
770 *Annual Review of Microbiology.* 2008. doi:10.1146/annurev.micro.62.081307.162848
- 771 54. Knust Z, Schmidt G. Cytotoxic necrotizing factors (CNFs)-a growing toxin family. *Toxins.*  
772 2010. doi:10.3390/toxins2010116
- 773 55. Ahmad S, Wang B, Walker MD, Tran HKR, Stogios PJ, Savchenko A, et al. An  
774 interbacterial toxin inhibits target cell growth by synthesizing (p)ppApp. *Nature.* 2019;575:  
775 674–678. doi:10.1038/s41586-019-1735-9
- 776 56. Siggers KA, Lesser CF. The Yeast *Saccharomyces cerevisiae*: A Versatile Model System  
777 for the Identification and Characterization of Bacterial Virulence Proteins. *Cell Host*  
778 *Microbe.* 2008;4: 8–15. doi:10.1016/j.chom.2008.06.004
- 779 57. Popa C, Coll NS, Valls M, Sessa G. Yeast as a Heterologous Model System to Uncover  
780 Type III Effector Function. Bliska JB, editor. *PLOS Pathog.* 2016;12: e1005360.  
781 doi:10.1371/journal.ppat.1005360
- 782 58. Robinson LA, Collins ACZ, Murphy RA, Davies JC, Allsopp LP. Diversity and prevalence  
783 of type VI secretion system effectors in clinical *Pseudomonas aeruginosa* isolates. *Front*  
784 *Microbiol.* 2023;13. doi:10.3389/fmicb.2022.1042505
- 785 59. Unterweger D, Miyata ST, Bachmann V, Brooks TM, Mullins T, Kostiuk B, et al. The  
786 *Vibrio cholerae* type VI secretion system employs diverse effector modules for  
787 intraspecific competition. *Nat Commun.* 2014;5: 3549. doi:10.1038/ncomms4549
- 788 60. Dar Y, Jana B, Bosis E, Salomon D. A binary effector module secreted by a type VI  
789 secretion system. *EMBO Rep.* 2022;23: e53981. doi:10.15252/embr.202153981
- 790 61. Wang W, Tang K, Wang P, Zeng Z, Xu T, Zhan W, et al. The coral pathogen *Vibrio*  
791 *coralliilyticus* kills non-pathogenic holobiont competitors by triggering prophage induction.  
792 *Nat Ecol Evol* 2022 68. 2022;6: 1132–1144. doi:10.1038/s41559-022-01795-y
- 793 62. Dunn AK, Millikan DS, Adin DM, Bose JL, Stabb E V. New *rfp*- and pES213-derived tools

- 794 for analyzing symbiotic *Vibrio fischeri* reveal patterns of infection and *lux* expression in  
795 situ. *Appl Environ Microbiol.* 2006;72: 802–810. doi:10.1128/AEM.72.1.802-810.2006
- 796 63. Gibson DG, Young L, Chuang RY, Venter JC, Hutchison CA, Smith HO. Enzymatic  
797 assembly of DNA molecules up to several hundred kilobases. *Nat Methods.* 2009;6: 343–  
798 345. doi:10.1038/nmeth.1318
- 799 64. Salomon D, Sessa G. Identification of growth inhibition phenotypes induced by  
800 expression of bacterial type III effectors in yeast. *J Vis Exp.* 2010; 4–7. doi:10.3791/1865
- 801 65. Bensadoun A, Weinstein D. Assay of proteins in the presence of interfering materials.  
802 *Anal Biochem.* 1976;70: 241–250. doi:10.1016/S0003-2697(76)80064-4
- 803 66. Li P, Kinch LN, Ray A, Dalia AB, Cong Q, Nunan LM, et al. Acute hepatopancreatic  
804 necrosis disease-causing *Vibrio parahaemolyticus* strains maintain an antibacterial type  
805 VI secretion system with versatile effector repertoires. *Appl Environ Microbiol.* 2017;83:  
806 e00737-17. doi:10.1128/AEM.00737-17
- 807 67. Cox J, Hein MY, Luber CA, Paron I, Nagaraj N, Mann M. Accurate proteome-wide label-  
808 free quantification by delayed normalization and maximal peptide ratio extraction, termed  
809 MaxLFQ. *Mol Cell Proteomics.* 2014;13. doi:10.1074/mcp.M113.031591
- 810 68. Tyanova S, Temu T, Sinitcyn P, Carlson A, Hein MY, Geiger T, et al. The Perseus  
811 computational platform for comprehensive analysis of (prote)omics data. *Nature Methods.*  
812 2016. doi:10.1038/nmeth.3901
- 813 69. Perez-Riverol Y, Bai J, Bandla C, García-Seisdedos D, Hewapathirana S,  
814 Kamatchinathan S, et al. The PRIDE database resources in 2022: A hub for mass  
815 spectrometry-based proteomics evidences. *Nucleic Acids Res.* 2022;50.  
816 doi:10.1093/nar/gkab1038
- 817 70. Erlich Z, Shlomovitz I, Edry-Botzer L, Cohen H, Frank D, Wang H, et al. Macrophages,  
818 rather than DCs, are responsible for inflammasome activity in the GM-CSF BMDC model.  
819 *Nature Immunology.* 2019. doi:10.1038/s41590-019-0313-5
- 820 71. Lee I, Ouk Kim Y, Park S-C, Chun J. OrthoANI: An improved algorithm and software for  
821 calculating average nucleotide identity. *Int J Syst Evol Microbiol.* 2016;66: 1100–1103.  
822 doi:10.1099/ijsem.0.000760
- 823 72. Fridman CM, Keppel K, Gerlic M, Bosis E, Salomon D. A comparative genomics  
824 methodology reveals a widespread family of membrane-disrupting T6SS effectors. *Nat*  
825 *Commun.* 2020;11: 1085. doi:10.1038/s41467-020-14951-4
- 826 73. Jana B, Fridman CM, Bosis E, Salomon D. A modular effector with a DNase domain and  
827 a marker for T6SS substrates. *Nat Commun.* 2019;10: 3595. doi:10.1038/s41467-019-  
828 11546-6
- 829 74. Katoh K, Misawa K, Kuma K, Miyata T. MAFFT: a novel method for rapid multiple  
830 sequence alignment based on fast Fourier transform. *Nucleic Acids Res.* 2002;30: 3059–  
831 66. Available: <http://www.ncbi.nlm.nih.gov/pubmed/12136088>
- 832 75. Katoh K, Rozewicki J, Yamada KD. MAFFT online service: Multiple sequence alignment,  
833 interactive sequence choice and visualization. *Brief Bioinform.* 2018;20: 1160–1166.  
834 doi:10.1093/bib/bbx108
- 835 76. Saitou N, Nei M. The neighbor-joining method: a new method for reconstructing  
836 phylogenetic trees. *Mol Biol Evol.* 1987;4: 406–425.  
837 doi:10.1093/oxfordjournals.molbev.a040454
